# Supplementary material
Source: publisher figshare collection journal article supplement (https://acs.figshare.com/ndownloader/files/12383252)
Supplement: Supplementary file 1 [file 12383252]

# **Optical activation of TrkA signaling**

## **Supplementary Information**

**Figure S1**

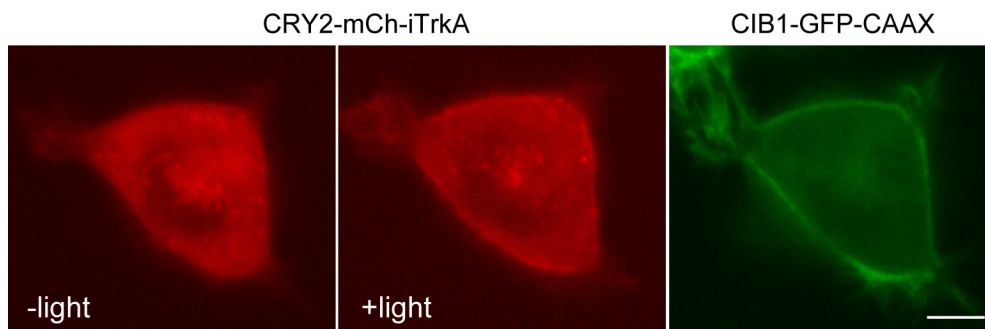

Figure S1: CRY2-mCh-iTrkA (opto-iTrkA) can be successfully recruited to plasma membrane by binding with CIB1-GFP-CAAX. PC12 cells were co-transfected with CRY2-mCh-iTrkA and CIB1-GFP-CAAX and subject to one pulse of 200 ms blue light exposure. Scale bar, 5 $\mu$ m.

**Figure S2**

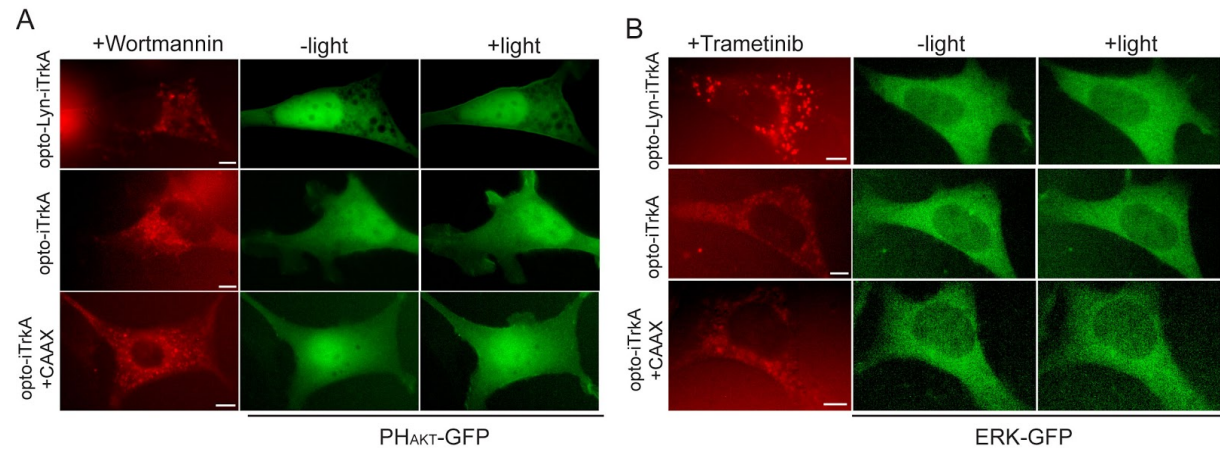

Figure S2: PI3K inhibitor wortmannin or MEK inhibitor trametinib suppressed the translocation of PH<sub>AKT</sub>-GFP or ERK-GFP in cells expressing TrkA/CRY2 systems. 3T3 cells were transfected with opto-Lyn-iTrkA, opto-iTrA or opto-iTrA+CAAX as well as PH<sub>AKT</sub>-GFP (A) or ERK-GFP (B). In cells expressing opto-iTrkA+CAAX, CIB1-CAAX was used without fluorescence reporter. The redistribution of PH<sub>AKT</sub>-GFP or ERK-GFP was suppressed compared with cells without the addition of inhibitors. Scale bars, 5μm.

**Figure S3**

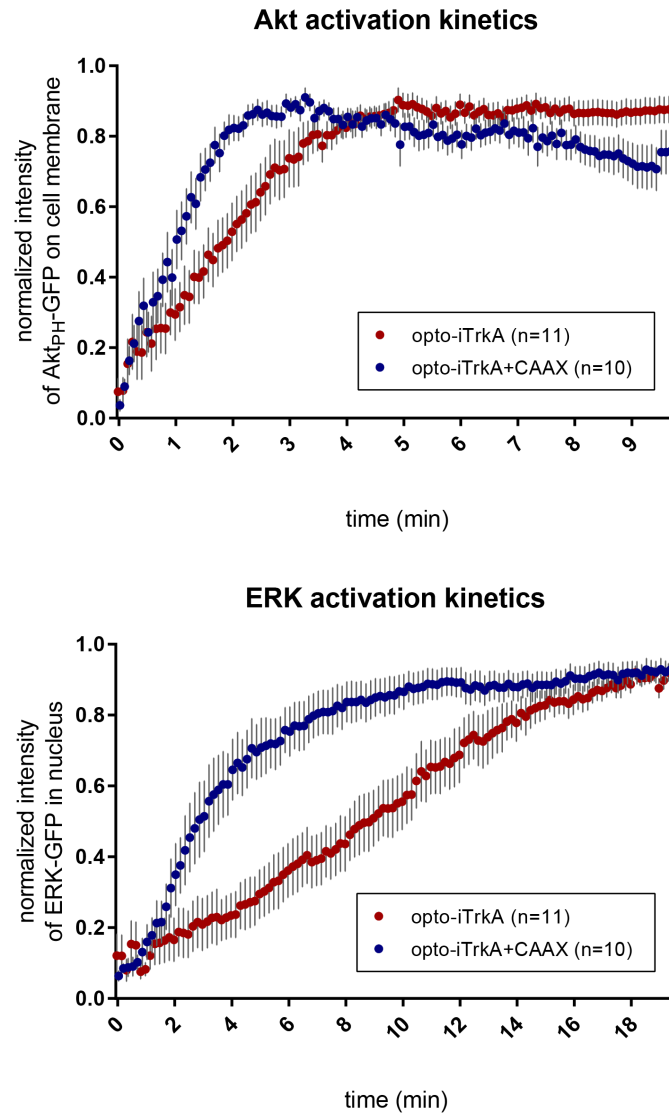

Figure S3: Kinetics of downstream activation of ERK and AKT after blue light illumination for opto-iTrkA (n=11 cells) and opto-iTrkA+CAAX (n=10 cells) systems. AKT activation was monitored by translocation of PH<sub>AKT</sub>-GFP to the plasma membrane after blue light stimulation (200 ms, 9.7 W/cm<sup>2</sup>, blue light pulses delivered at 5 s intervals for 10 min). ERK activation was monitored by translocation of ERK-GFP into the nucleus after blue light stimulation (200 ms, 9.7 W/cm<sup>2</sup>, blue light pulses delivered at 10 s intervals for 20 min). Kinetics of activation of downstream signaling cascades are delayed for opto-iTrkA (cytosolic) compared to opto-iTrkA+CAAX. The quantification method is described in Methods: Data Analysis. The time dependent change of the ratio was normalized for each cell and then averaged to obtain the kinetic plots.

**Figure S4**

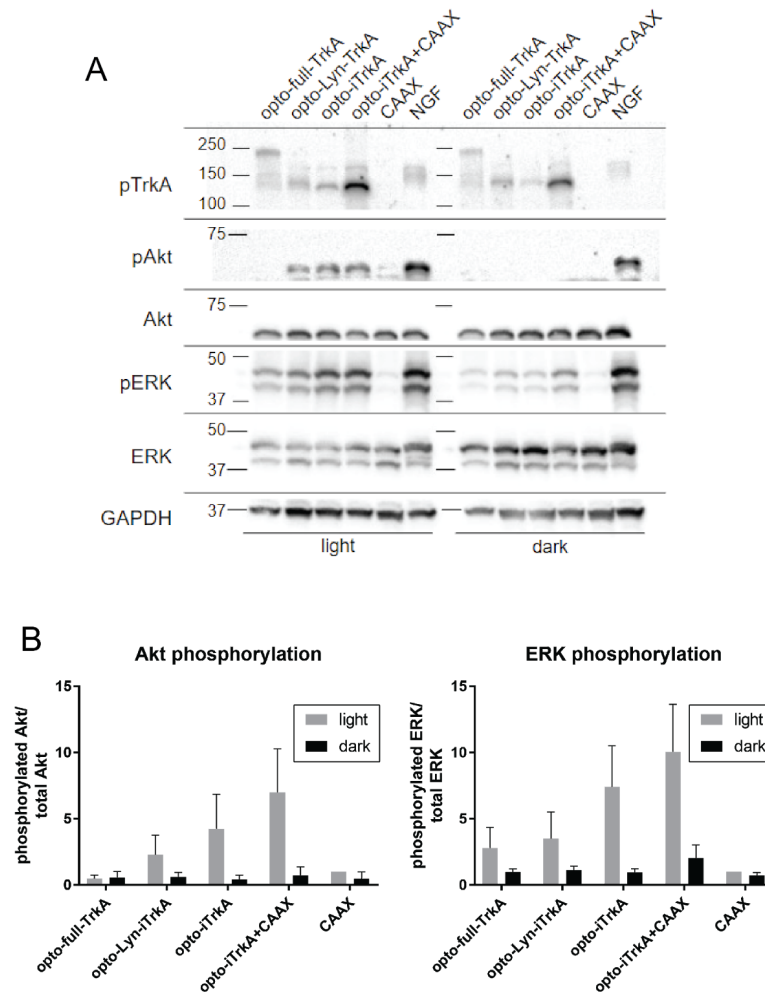

Figure S4: (A) Western blot analysis of optoTrkA systems for phosphorylated TrkA (Tyr490), phosphorylated ERK (Thr202 and Tyr204) and phosphorylated AKT (Ser473). Cells were transfected with CIBN CAAX alone as a negative control. Untransfected cells were treated with NGF for 20 minutes as a positive control. Opto-iTrkA and opto-iTrkA+CAAX exhibit TrkA, AKT, and ERK phosphorylation upon blue light stimulation. (200  $\mu\text{W}/\text{cm}^2$  continuous blue light illumination for 20 minutes) (B) Blots from three independent biological replicates were quantified by densitometry. Plots show mean + SEM, normalized to negative control CAAX with light illumination.

**Figure S5**

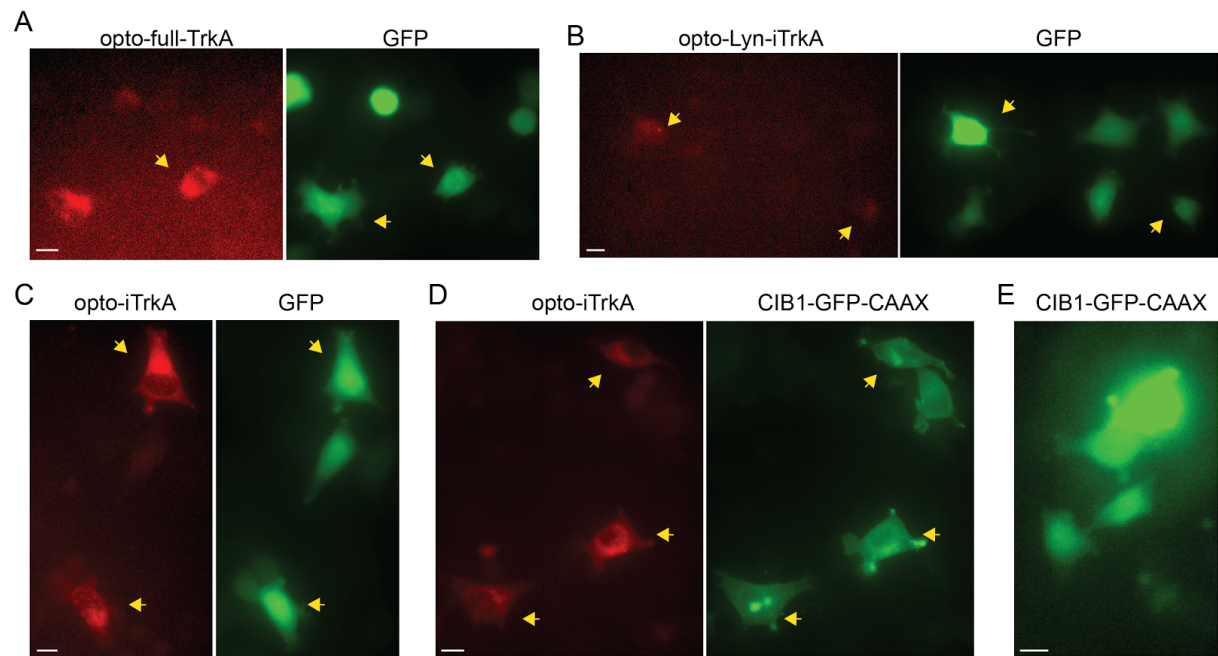

Figure S5: In dark, PC12 cells expressing each of the four TrkA/CRY2 systems(A-D) or CIB1-GFP-CAAX (E) showed no obvious neurite growth. Scale bars, 10 $\mu$ m.

**Table S1**

|       |           | opto-full-TrkA |           | opto-Lyn-iTrkA |           | opto-iTrkA |           | opto-iTrkA+CAX |           | CAAX only |           |
|-------|-----------|----------------|-----------|----------------|-----------|------------|-----------|----------------|-----------|-----------|-----------|
|       | #of cells | Total #        | + neurite | Total #        | + neurite | Total #    | + neurite | Total #        | + neurite | Total #   | + neurite |
| Set 1 | dark      | 286            | 4         | 290            | 14        | 306        | 12        | 289            | 2         | 278       | 6         |
|       | light     | 243            | 9         | 199            | 53        | 292        | 140       | 194            | 142       | 293       | 6         |
| Set 2 | dark      | 262            | 13        | 300            | 40        | 306        | 21        | 289            | 8         | 255       | 1         |
|       | light     | 272            | 22        | 285            | 55        | 238        | 52        | 181            | 113       | 265       | 3         |
| Set 3 | dark      | 312            | 28        | 301            | 60        | 341        | 27        | 289            | 4         | 261       | 7         |
|       | light     | 231            | 21        | 275            | 53        | 230        | 76        | 208            | 98        | 292       | 2         |

Table S1: number of PC12 cells for quantification in Fig. 3

**Table S2**

|       |           | opto-full-TrkA |         | opto-Lyn-iTrkA |         | opto-iTrkA |         | opto-iTrkA+CAX |         |
|-------|-----------|----------------|---------|----------------|---------|------------|---------|----------------|---------|
|       | #of cells | Total #        | surived | Total #        | surived | Total #    | surived | Total #        | surived |
| Set 1 | dark      | 122            | 1       | 179            | 2       | 96         | 0       | 194            | 8       |
|       | light     | 366            | 33      | 197            | 79      | 422        | 333     | 701            | 615     |
| Set 2 | dark      | 119            | 5       | 94             | 8       | 194        | 8       | 99             | 1       |
|       | light     | 76             | 6       | 223            | 11      | 88         | 47      | 226            | 119     |
| Set 3 | dark      | 136            | 1       | 75             | 4       | 132        | 3       | 70             | 1       |
|       | light     | 77             | 5       | 103            | 41      | 145        | 58      | 120            | 96      |

Table S2: number of DRG cells for quantification in Fig. 4
